# Supplementary material for: Evaluation of Proinflammatory Chemokines in HIV Patients with Asymptomatic Leishmania Infantum Infection
Source: MDPI journal article supplement (doi:10.3390/tropicalmed8110495), 2023-11-09
Supplement: s1 [file s1]

Table S1: Comparison of demographic features between co-infected and HIV patients from Pernambuco, Brazil.

| Demographic features | Co-Infection ( <i>n</i> = 53) | HIV ( <i>n</i> = 90)    | <i>p</i> |
|----------------------|-------------------------------|-------------------------|----------|
| Gender               |                               |                         |          |
| Male                 | 35 (66,04) <sup>a</sup>       | 54 (60) <sup>a</sup>    | 0.47     |
| Female               | 18 (33,96) <sup>a</sup>       | 36 (40) <sup>a</sup>    |          |
| Age (years)          | 34 (18-57) <sup>b</sup>       | 35 (17-58) <sup>b</sup> | 0.70     |
| Income (month)       |                               |                         |          |
| < US\$ 249.2         | 43 (81) <sup>a</sup>          | 65 (72) <sup>a</sup>    | 0.31     |
| US\$ 249.2-498.4     | 8 (15) <sup>a</sup>           | 23 (26) <sup>a</sup>    |          |
| > US\$ 498.4         | 2 (4) <sup>a</sup>            | 2 (2) <sup>a</sup>      |          |

<sup>a</sup> Frequency data (%). <sup>b</sup> Data presented as median with the 25th and 75th percentiles in parentheses.
